# Supplementary material for: Research on the Tufts Be Well at Work Program for Employees With Depression: 2005–2020
Source: Atypon-hosted journal article supplement (doi:10.1176/appi.ps.202000762), 2021-05-07
Supplement: appi.ps.202000762.ds001.pdf [file appi.ps.202000762.ds001.pdf]

**Supplemental Appendix**

|                                                       | Study 1:<br>Global Security Company | Study 2:<br>State Government Employer #1 |                 |                                          | Study 3:<br>Health Care Services Group and Individual Employers |                 |                                      | Study 4: VA Medical Center (VAMC) Behavioral Health Lab |                 |                                      | Study 5:<br>State Government Employer #2 | Study 6:<br>Academic Medical Center |
|-------------------------------------------------------|-------------------------------------|------------------------------------------|-----------------|------------------------------------------|-----------------------------------------------------------------|-----------------|--------------------------------------|---------------------------------------------------------|-----------------|--------------------------------------|------------------------------------------|-------------------------------------|
|                                                       | Be Well at Work                     | Usual Care                               | Be Well at Work | Difference in Difference/Adjusted Effect | Usual Care                                                      | Be Well at Work | Difference in Change/Adjusted Effect | Usual Care                                              | Be Well at Work | Difference in Change/Adjusted Effect | Be Well at Work                          | Be Well at Work                     |
| No. Employees enrolled                                | 86                                  | 27                                       | 52              |                                          | 214                                                             | 217             |                                      | 114                                                     | 139             |                                      | 272                                      | 25                                  |
| No. Completing follow-up survey                       | 76                                  | 25                                       | 47              |                                          | 190                                                             | 190             |                                      | 96                                                      | 115             |                                      | 87                                       | 19                                  |
| Statistical Method <sup>a</sup>                       |                                     |                                          |                 | Regression <sup>a1</sup>                 |                                                                 |                 | Mixed Model <sup>a2</sup>            |                                                         |                 | ANCOVA <sup>a3</sup>                 |                                          |                                     |
| Presenteeism                                          |                                     |                                          |                 |                                          |                                                                 |                 |                                      |                                                         |                 |                                      |                                          |                                     |
| At-work productivity loss, baseline, mean (SD)        | 9.7 (4.3)                           | 10.1 (3.8)                               | 10.3 (4.3)      | NA                                       | 10.4 (4.5)                                                      | 10.2 (4.3)      | NA                                   | 12.3 (4.5)                                              | 12.4 (4.9)      | NA                                   | 9.3 (4.5)                                | 10.8 (4.1)                          |
| At-work productivity loss, change, mean <sup>b</sup>  | -6.4***                             | -0.3                                     | -3.5            | -2.9**                                   | -1.4                                                            | -4.5            | -3.2***                              | -0.1                                                    | -2.1            | -1.7**                               | -3.0***                                  | -6.9***                             |
| % Time at work with limitations, by task <sup>c</sup> |                                     |                                          |                 |                                          |                                                                 |                 |                                      |                                                         |                 |                                      |                                          |                                     |
| Time Management, mean change                          | -17.3*                              | -0.9                                     | -18.1           | -15.4**                                  | -2.6                                                            | -19.2           | -15.6***                             | 0.3                                                     | -7.2            | -7.4*                                | -14.7**                                  | -39.9***                            |
| Physical Job tasks, mean change                       | -3.6                                | -2.0                                     | -10.9           | -11.7*                                   | -1.7                                                            | -9.8            | -7.1***                              | -7.4                                                    | -14.1           | -6.7*                                | -8.9*                                    | -11.5**                             |
| Mental-Interpersonal Job Tasks, mean change           | -12.3**                             | -1.6                                     | -11.8           | -9.5*                                    | -6.9                                                            | -17.3           | -11.1***                             | -0.5                                                    | -6.1            | -5.6                                 | -11.9**                                  | -25.9***                            |
| Output Tasks, mean change                             | -16.4**                             | 1.0                                      | -14.2           | -13.9***                                 | -6.0                                                            | -19.8           | -14***                               | -2.3                                                    | -7.8            | -5.5                                 | -9.9*                                    | -23.8***                            |

|                                                                                 |            |            |            |          |            |            |         |            |            |        |            |            |
|---------------------------------------------------------------------------------|------------|------------|------------|----------|------------|------------|---------|------------|------------|--------|------------|------------|
| Productivity Loss Due to Absence, change, mean <sup>d</sup>                     | -0.4*      | 9.0        | -7.1       | -15.0*** | -1.7       | -6.9       | -6.4**  | -1.3       | -4         | -3.7   | -9.3***    | NA         |
| PHQ-9 Symptom Severity Score, baseline, mean (SD)                               | 13.5 (4.4) | 12.2 (5.6) | 13.1 (5.6) | NA       | 14.3 (5.0) | 14.4 (5.0) | NA      | 14.8 (4.8) | 14.1 (4.9) | NA     | 12.3 (5.2) | 17.5 (5.0) |
| PHQ-9 Symptom Severity Score, change, mean <sup>e</sup>                         | -6.5***    | 0.6        | -5.4       | -6.8***  | -3.7       | -7.3       | -3.7*** | -1.6       | -3.8       | -2.1** | -6.1***    | -10.6***   |
| Economic Outcomes                                                               |            |            |            |          |            |            |         |            |            |        |            |            |
| Benefit: 1 yr productivity cost savings per participant from Be Well at Work    | –          |            | \$6,041    |          |            | \$6,048    |         |            | \$1,800    |        | \$7,600    | NA         |
| Be Well at Work cost per participant                                            | –          |            | \$979      |          |            | \$977      |         |            | \$691      |        | \$700      | \$700      |
| Total savings of Be Well at Work per participant                                | –          |            | \$5,062    |          |            | \$5,071    |         |            | \$1,109    |        | \$6,900    | NA         |
| Return on Investment (ratio; dollars saved: benefit minus cost divided by cost) | –          |            | 5.4        |          |            | 5.2        |         |            | 1.6        |        | 11.1       | NA         |

\*Statistically significant result at p<0.05; \*\*p<.01; \*\*\* p<.001

<sup>a</sup> In the three RCTs, models were adjusted according to statistical methodology used. <sup>a1</sup> Adjusted for baseline score, age, gender and occupation.

<sup>a2</sup> Adjusted for baseline mean age, percentage male, percentage white, percentage married, percentage white collar, mean number of comorbidities, percentage full-time employed, and mean scores of the model's dependent variable. All significance tests were conducted with the chi-square test (df=1).

<sup>a3</sup> Controlled for baseline values of the outcome variable.

<sup>b</sup> Based on responses to the Work Limitations Questionnaire (WLQ). At-work productivity loss reflects the estimated percentage difference in at-work productivity between a person (or group) completing the WLQ and an external benchmark sample of healthy workers. Possible scores range from 0% to 25%, with higher scores indicating greater productivity loss.

<sup>c</sup> WLQ scale scores indicate the percentage of time the person was limited in the past 2 weeks in ability to perform job tasks (for example, time management). Possible scale scores range from 0 to 100, with higher scores indicating a greater percentage of time limited.

<sup>d</sup> Based on responses to the WLQ Time Loss Module. Productivity loss is the mean percentage of hours missed in the past 2 weeks divided by the total number of hours usually worked in that time period. Possible days missed range from 0 to 14. Possible percentage productivity loss due to absence ranges from 0 to 100, with higher scores indicating greater productivity loss.

<sup>e</sup> Assessed with the PHQ-9. Possible scores range from 0 to 27, with higher scores indicating more severe depressive symptoms.
